# Supplementary material for: A mass-tagged MOF nanoprobe approach for ultra-sensitive protein quantification in tumor-educated platelets
Source: Royal Society of Chemistry journal article supplement (doi:10.1039/d2cc01815b), 2022-01-01
Supplement: d2cc01815b1.pdf [file d2cc01815b1.pdf]

1

2

3

## Supporting Information

4

### 5 **A mass-tagged MOF nanoprobe approach for ultra-sensitive protein** 6 **quantification in tumor-educated platelets**

7

8 Xiuyu Chen,<sup>a</sup> Jianhua Zhu,<sup>a</sup> Bo Sun,<sup>a</sup> Xian Zhang,<sup>a</sup> Yechen Hu,<sup>\*a</sup> Yun Chen<sup>\*abc</sup>

9

10

11

12

13 <sup>a</sup> School of Pharmacy, Nanjing Medical University, Nanjing, 211166, China

14 <sup>b</sup> State Key Laboratory of Reproductive Medicine, 210029, China

15 <sup>c</sup> Key Laboratory of Cardiovascular & Cerebrovascular Medicine, Nanjing, 211166,  
16 China

17 \*Correspondence: Dr. Yun Chen and Dr. Yechen Hu, School of Pharmacy, Nanjing  
18 Medical University, 818 Tian Yuan East Road, Nanjing, 211166, China

19 E-mail: huyechen@njmu.edu.cn (Yechen Hu); ychen@njmu.edu.cn (Yun Chen)

20 Phone: 86-25-86868326

21 Fax: 86-25-86868467

22

## 23 **Table of Contents**

### 24 **1. Supplementary Materials and Methods**

25 **1.1.** Materials and instruments.

26 **1.2.** Preparation and characterization of the activable aptamer.

27 **1.3.** Development and validation of LC-MS/MS method.

28 **1.4.** Preparation of mass-tagged MOF nanoprobe.

29 **1.5.** Acidic release of mass tag from the nanoprobe.

30 **1.6.** Cell culture and blood collection.

31 **1.7.** Evaluation of the selectivity of the mass-tagged MOF nanoprobe approach.

32 **1.8.** Platelet separation.

33 **1.9.** Detection of CD44 protein in samples.

### 34 **2. Supplementary Figures**

35 **Figure S1.** Schematic illustration of toe-hold strand-displacement reaction (TSDR).

36 **Figure S2.** Characteristic evaluation of the activable aptamer.

37 **Figure S3.** The secondary structures of TA63, INH6, C42 and BDNA.

38 **Figure S4.** The  $\Delta G$  values of the hybridization of INH6 and C42 with TA63.

39 **Figure S5.** The representative binding curve of the activable aptamer with recombinant CD44  
40 protein.

41 **Figure S6.** Establishment of mass spectrometry quantification method for the mass tag.

42 **Figure S7.** Optimization of the mass-tagged MOF nanoprobe preparation conditions.

43 **Figure S8.** pH effect on acidolysis of the mass-tagged MOF nanoprobe.

44 **Figure S9.** Characteristic evaluation of the mass tag.

45 **Figure S10.** Dispersibility and stability of the mass-tagged MOF nanoprobe.

46 **Figure S11.** LC-MS/MS chromatograms of LLOQ and matrix blank.

47 **Figure S12.** Selectivity of the mass-tagged MOF nanoprobe approach.

48 **Figure S13.** Measurement of P-selectin expression as the platelet activation marker in normal  
49 individuals and controls.

50 **Figure S14.** Detection of CD44 in the platelet samples from breast cancer patients with the  
51 lowest and highest CD44 expression by (A) flow cytometry and (B) mass-tagged MOF nanoprobe

52 approach.

### 53 **3. Supplementary Tables**

54 **Table S1.** List of the DNA sequences used in this study.

55 **Table S2.** Comparison of our approach with the previously reported signal amplification methods  
56 for CD44 quantification.

57 **Table S3.** Evaluation of the accuracy and precision of the mass-tagged MOF nanoprobe  
58 approach.

59 **Table S4.** Clinical information of normal individuals and breast cancer patients.

### 60 **4. Supplementary Results**

61 **4.1.** LC-MS/MS method of the mass tag.

62 **4.2.** Characterization results of the mass-tagged MOF nanoprobe.

63 **4.3.** Validation results of the mass-tagged MOF nanoprobe approach.

64

## 65 **1. Supplementary Materials and Methods**

### 66 **1.1. Materials and instruments**

67 Peptide mass tag (AVLGVDPFR) and the corresponding stable isotope-labeled  
68 internal standard were prepared by Synpeptide Co., Ltd. (Shanghai, China). All the  
69 DNA sequences including TA6 aptamer<sup>1</sup> and histidine magnetic beads were  
70 purchased from Sangon Biological Engineering Technology & Co. Ltd. (Shanghai,  
71 China). Zinc nitrate was purchased from Sinopharm Chemical Reagent Co., Ltd  
72 (Shanghai, China). 2-Methylimidazole was supplied by Sigma-Aldrich Inc. (St. Louis,  
73 MO, USA). Poly (ethylene glycol) (PEG, MW=2000 Da) was purchased from Ponsure  
74 Biological (Shanghai, China). Recombinant Human CD44 (C-6His), CD62P (PE anti-  
75 human) were purchased from Biolegend (San Diego, California, USA). Dulbecco's  
76 Modified Eagle Medium (DMEM), Roswell Park Memorial Institute (RPMI) 1640  
77 medium, fetal bovine serum (FBS) and streptavidin-modified beads were obtained  
78 from Thermo Scientific (Logan, UT, USA). Trypsin was purchased from Promega  
79 (Madison, WI, USA). Phosphate buffered saline (PBS) was purchased from Beyotime  
80 Institute of Biotechnology (Haimen, China). Binding buffer (5 mmol/L MgCl<sub>2</sub>, 4.5 g/L  
81 glucose, 0.1 g/L salmon sperm DNA, and 1 g/L BSA in PBS) was used to reduce the  
82 nonspecific binding of the activable aptamer. Acetonitrile (ACN) and methanol were  
83 HPLC grade and were purchased from Tedia Company, Inc. (Fairfield, OH, USA).  
84 Formic acid (FA) was purchased from Aladdin Chemistry Co., Ltd. (Shanghai, China).  
85 All the reaction solutions were treated with 0.1% diethylpyrocarbonate (DEPC) to  
86 inactivate nucleases.

87 Mass tag was analyzed by an AB SCIEX ExionLC AD system (AB SCIEX,  
88 Framingham, MA, USA) coupled with an AB SCIEX QTRAP 5500 mass spectrometry  
89 system (AB SCIEX, Framingham, MA, USA). An Agilent InfinityLab Poroshell 120 SB  
90 C18 column (2.7 μm, 30 mm × 2.1 mm, Agilent, USA) was used for LC separation. A F-  
91 4600 spectrofluorometer (Hitachi, Japan) was used to measure the K<sub>d</sub> for aptamer.  
92 The TEM images and the EDX elemental mapping were taken on JEM-2800 (JEOL,  
93 Japan). The size and zeta potential of particles were recorded on a Zs90 Zetasizer  
94 (Malvern, UK). SEM was conducted with a Zeiss Sigma 500 (Carl Zeiss AG, Germany).

95 FT-IR spectroscopy was performed on a Perkin Elmer Spectrum One Fourier  
96 Transformed Infrared spectrometer (Bruker Corporation, Germany). PXRD was  
97 recorded on a D8 Advance X-ray diffractometer (Bruker Corporation, Germany). An  
98 Aria III FACScan flow cytometer (Becton Dickinson, Franklin Lakes, NJ, USA) was used  
99 to assess the aptamer specificity. TGA analysis was performed on a Mettler  
100 TGA/DSC3+ (Mettler-Toledo, Switzerland).

101

## 102 **1.2. Preparation and characterization of the activable aptamer**

103 The activable aptamer was prepared by hybridization of the aptamer portion  
104 and the inhibitory DNA. First, 30  $\mu\text{L}$  of 10  $\mu\text{M}$  the aptamer portion and 45  $\mu\text{L}$  of 10  
105  $\mu\text{M}$  inhibitory DNA were mixed, heated at 95  $^{\circ}\text{C}$  for 10 min, and slowly annealed by  
106 cooling to room temperature for approximately 60 min. Then, the mixture was  
107 hybridized at 37  $^{\circ}\text{C}$  for 60 min to form the activable aptamer. The obtained activable  
108 aptamer was stored at 4  $^{\circ}\text{C}$  for further use.

109 The binding affinity of activable aptamer was determined by incubating various  
110 concentrations of FITC-labeled activable aptamer with 100  $\mu\text{L}$  of 500 nM histidine-  
111 tagged CD44 recombinant proteins for 60 min at 37  $^{\circ}\text{C}$  in the dark. After incubation,  
112 activable aptamer-CD44 complexes were immobilized on histidine magnetic beads  
113 for 90 min at 37  $^{\circ}\text{C}$  and then washed three times. Afterward, 100  $\mu\text{L}$  of 500 nM  
114 competing DNA was added and the reaction was performed at 37  $^{\circ}\text{C}$  for 60 min in  
115 the dark. Finally, the supernatant was collected and the fluorescence was detected  
116 using a spectrofluorometer. The  $K_d$  was calculated from the following equation:

$$117 \quad Y = B_{\max} X / (K_d + X) \quad (1)$$

118 where X is the concentration of the added activable aptamer, Y is the obtained  
119 fluorescence intensity and  $B_{\max}$  is the maximum binding capacity.

120 To test the specificity of the activable aptamer, MCF-7 cells (CD44-positive) and  
121 NIH-3T3 cells (CD44-negative) were separately collected in the exponential phase of  
122 growth. After washing three times with PBS, the cells were diluted to  $1 \times 10^6$   
123 cells/mL with binding buffer, and incubated with 45  $\mu\text{L}$  of 10  $\mu\text{M}$  FITC-labeled  
124 random DNA or FITC-labeled activable aptamer at 37  $^{\circ}\text{C}$  for 60 min in the dark. After

125 washing with PBS three times, 60  $\mu$ L of 10  $\mu$ M competing DNA was added into cells,  
126 which were incubated at 37  $^{\circ}$ C for an additional 60 min. Finally, the cells were  
127 centrifuged at 1000 rpm for 3 min, further washed at least three times with PBS, and  
128 resuspended in 500  $\mu$ L of PBS for flow cytometric analysis.

129

### 130 **1.3. Development and validation of liquid chromatography tandem mass** 131 **spectrometry (LC-MS/MS) method**

132 We used LC-MS/MS method to quantify mass tag. The mobile phase consisted  
133 of solvent A (water with 0.1% FA) and solvent B (100% ACN). An injection volume of  
134 5  $\mu$ L and a flow rate of 0.3 mL/min were used. Elution time of 10 min was performed  
135 for the mass tag samples with a gradient of 10% solvent B for 1 min, 10-90% solvent  
136 B for 4 min, 90-10% solvent B for 4 min, and 10% solvent B for 1 min. For mass  
137 spectrometry parameters, 550  $^{\circ}$ C ion source temperature and 5500 V ion spray  
138 voltage were used. The pressures of curtain gas, ion source Gas1, and ion source  
139 Gas2 were set to 35, 55, and 55 psi, respectively. The collision gas pressure was set  
140 to medium. All mass tags were scanned in positive electrospray ionization mode.  
141 Data were collected and analyzed using AB SCIEX Analyst software (version 1.6.3).

142 Furthermore, the calibration standards of CD44 were prepared by serially  
143 diluting the 1 mg/mL stock solutions into 10.0 pg/mL, 100 pg/mL, 1.00 ng/mL, 10.0  
144 ng/mL, and 100 ng/mL, respectively. Correspondingly, the QC standards (i.e., lower  
145 limit of quantification (LLOQ), low QC, mid QC, and high QC) were set at 10.0 pg/mL,  
146 30.0 pg/mL, 1.00 ng/mL, 80.0 ng/mL.

147

### 148 **1.4. Preparation of mass-tagged MOF nanoprobe**

149 For ZIF-8 MOF preparation, 200 mg Zn (NO<sub>3</sub>)<sub>2</sub>·6H<sub>2</sub>O was dissolved in 800  $\mu$ L  
150 methanol, and 4 g 2-methylimidazole was dissolved in 8 mL methanol. Then, the 2-  
151 methylimidazole solution was added dropwise to the Zn (NO<sub>3</sub>)<sub>2</sub>·6H<sub>2</sub>O solution  
152 dropwise and the mixture was stirred for 3 h at room temperature. The solvent was  
153 removed by centrifugation. The product was then washed three times with  
154 methanol and dried at 37  $^{\circ}$ C under vacuum.

155 For mass tag@ZIF-8 MOF preparation, first, 200 mg Zn (NO<sub>3</sub>)<sub>2</sub>·6H<sub>2</sub>O was  
156 dissolved in 800 μL methanol, and 4 g 2-methylimidazole was dissolved in 8 mL  
157 methanol. Then, 10 μL mass tag solution (35 mg/mL) was mixed with the Zn  
158 (NO<sub>3</sub>)<sub>2</sub>·6H<sub>2</sub>O solution with stirring. The 2-methylimidazole solution was further  
159 added and the mixture was stirred for 3 h at room temperature. The product was  
160 collected by centrifugation, followed by washing three times with methanol and  
161 drying at 37 °C under vacuum.

162 For PEG/mass tag@ZIF-8 MOF preparation, 40 mg N<sub>3</sub>-PEG-NH<sub>2</sub> was dissolved in  
163 4 mL deionized water. Then, the solution was dropped into 40 mg mass tag@ZIF-8  
164 MOF, and the mixture was stirred at room temperature for 12 h. Finally, the product  
165 was collected by centrifugation, followed by washing three times with methanol and  
166 drying at 37 °C under vacuum.

167 For BDNA/PEG/mass tag@ZIF-8 MOF preparation, 15 mg PEG/mass tag@ZIF-8  
168 MOF was dissolved in 1.5 mL deionized water, and then mixed with 30 μL of 100 μM  
169 binding DNA at 37 °C for 2 h. Then, the product was washed three times with  
170 methanol and dried at 37 °C under vacuum.

171

### 172 **1.5. Acidic release of mass tag from the nanoprobe**

173 The release experiment was performed by dissolving 0.1 mg BDNA/PEG/mass  
174 tag@ZIF-8 MOF into 1 mL PBS solution (pH 2.0 and 7.4) and ultrasonicated at 0 °C for  
175 100 min. Then, the amount of released mass tag was detected by mass  
176 spectrometry.

177 The ultimate encapsulated number of the mass tag per BDNA/PEG/mass  
178 tag@ZIF-8 MOF particle (N) was calculated according to the following equation:

$$179 \quad N = N_1 / N_2 = (N_3 - C_1 V_1 N_A) / N_2 \quad (2)$$

180 where N<sub>1</sub> is the encapsulated mass tag number in BDNA/PEG/mass tag@ZIF-8 MOF,  
181 N<sub>2</sub> is the number of BDNA/PEG/mass tag@ZIF-8 MOF particles, N<sub>3</sub> is the total  
182 number of mass tags added for preparation, C<sub>1</sub> is the concentration of the mass tag  
183 left after encapsulation, and V<sub>1</sub> is the reaction volume, N<sub>A</sub> = 6.02 × 10<sup>23</sup>.

184

185 **1.6. Cell culture and blood collection**

186 MCF-7, NIH-3T3 and MDA-MB-231 cells were purchased from the Cell Resource  
187 Center of Chinese Academy of Medical Sciences. MCF-7 and NIH-3T3 cell lines were  
188 cultured in Dulbecco's Modified Eagle's Medium with 1% penicillin/streptomycin and  
189 10% FBS, at 37 °C in a humidified incubator with 5% CO<sub>2</sub>. MDA-MB-231 cells were  
190 fed in RPMI 1640 containing 10% FBS and 1% penicillin/streptomycin in a 37 °C  
191 incubator with 5% CO<sub>2</sub>. Changing the culture medium every 2 days and then the  
192 exponential-phase cells were used in the subsequent experiments.

193 The collection of blood samples from breast cancer patients and normal  
194 individuals in this study was conducted in accordance with the guidelines approved  
195 by the Ethics Committee of Nanjing Medical University. Blood samples were  
196 collected from 54 breast cancer patients and 10 normal individuals at the Cancer  
197 Hospital of Jiangsu (Nanjing, China) between November 2020 and March 2021.  
198 Subjects with inflammatory disease, diabetes, or nonsteroidal anti-inflammatory  
199 drug use were excluded from the study. All the subjects received informed consent,  
200 and they were biologically unrelated and belonged to the Han ethnic group in  
201 Jiangsu Province, China.

202

203 **1.7. Evaluation of the selectivity of the mass-tagged MOF nanoprobe approach**

204 To test the selectivity of the mass-tagged MOF nanoprobe approach, a series of  
205 cell lines with differential expression of CD44, including MDA-MB-231 cells (high  
206 expression), MCF-7 cells (low expression), NIH-3T3 cells (negative), and MDA-MB-  
207 231 cells pretreated with CD44 antibody for blocking, were investigated. In blocking  
208 experiment, MDA-MB-231 cells were collected and pretreated with CD44 antibody  
209 (100 µg/mL) at 37 °C for 60 min. Afterwards, all the cells were incubated with 30 µL  
210 of 10 µM activable aptamer for 60 min at 37 °C. After washing with PBS three times,  
211 60 µL of 10 µM competing DNA was added and incubated for an additional 60 min at  
212 37 °C. Then, the supernatant was collected and incubated with 20 µL streptavidin-  
213 modified beads at 37 °C for 90 min with continuous shaking. After washing with PBS  
214 three times, the supernatant was discarded and the sediment was further incubated



215 with 200  $\mu$ L BDNA/PEG/mass tag@ZIF-8 MOF (1 mg/mL) at 37  $^{\circ}$ C for 90 min. After  
216 washing with PBS three times, 200  $\mu$ L PBS (pH 2.0) was added into the sediment and  
217 then treated with ultrasound at 0  $^{\circ}$ C for 20 min. Finally, after washing with 200  $\mu$ L  
218 PBS (pH 2.0) three times, all the supernatants were combined and subjected to mass  
219 spectrometry.

220

### 221 **1.8. Platelet separation**

222 First, the whole blood samples were gently reversed and mixed several times,  
223 then centrifuged for 20 min at 120  $\times$ g at room temperature to acquire the platelet-  
224 rich plasma within 24 h. Then, carefully drain the upper layer of platelet-rich plasma  
225 into a new tube, after which centrifuged for 20 min at 360  $\times$ g at room temperature  
226 to obtain the platelets deposition. Finally, the platelets deposition was gently  
227 resuspended and washed with PBS at least three times for the following experiment.

228 To assess sample purity, seven lots of platelets were randomly selected and  
229 fixed in 3.7% (w/v) paraformaldehyde (PFA) for 20 min and stained with crystal violet  
230 at room temperature for another 20 min in the dark. Counts of nucleated cell were  
231 determined by manual cell counting on a microscope by two observers.  
232 Contamination was controlled in 1-5 nucleated cells per 10 million platelets.  
233 Furthermore, to assess blood platelet activation during platelets isolation, we  
234 measured the expression level of the platelet activation dependent marker P-  
235 selectin (CD62P). For flow cytometric analysis, the extracted platelets were prefixed  
236 in 0.5% formaldehyde, stained by PE-modified CD62P for 30 min in the dark, and  
237 stored in 1.0% formaldehyde.

238

### 239 **1.9. Detection of CD44 protein in samples**

240 First, 30  $\mu$ L of 10  $\mu$ M activable aptamer was incubated with samples, including  
241 recombinant human CD44 protein (0.01-100 ng), breast cancer cells ( $10^6$  cells) and  
242 extracted platelets (4 mL whole blood), for 60 min at 37  $^{\circ}$ C. After washing with PBS  
243 three times, 60  $\mu$ L of 10  $\mu$ M competing DNA was added and incubated for an  
244 additional 60 min at 37  $^{\circ}$ C. Then, the supernatant was collected and incubated with

245 20  $\mu$ L streptavidin-modified beads at 37  $^{\circ}$ C for 90 min with continuous shaking. After  
246 washing with PBS three times, the supernatant was discarded and the sediment was  
247 further incubated with 200  $\mu$ L BDNA/PEG/mass tag@ZIF-8 MOF (1 mg/mL) at 37  $^{\circ}$ C  
248 for 90 min. After washing with PBS three times, 200  $\mu$ L PBS (pH 2.0) was added into  
249 the sediment and then treated with ultrasound at 0  $^{\circ}$ C for 20 min. Finally, after  
250 washing with 200  $\mu$ L PBS (pH 2.0) three times, all the supernatants were combined  
251 and subjected to mass spectrometry.

252

253 **2. Supplementary Figures**

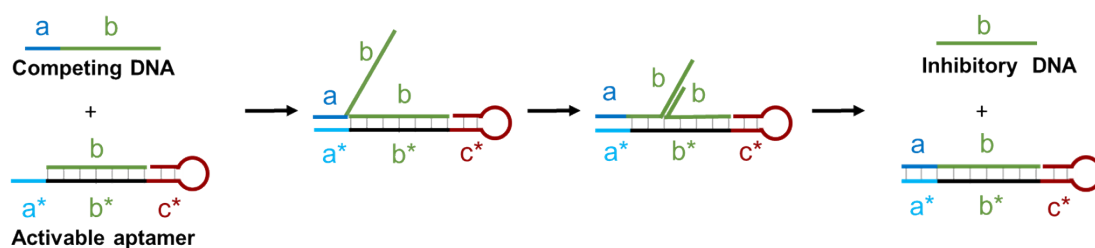

**b:** Inhibitory DNA      **a + b:** Competing DNA      **a\* + b\* + c\*:** Aptamer portion

254 **a\*:** Toehold domain      **a\* + b\*:** Extended sequence      **c\*:** CD44 aptamer alone

255 **Figure S1.** Schematic illustration of toe-hold strand-displacement reaction (TSDR).  
 256 TSDR is initiated by the hybridization of the competing DNA (a + b) with the toehold  
 257 domain (a\*) in the activable aptamer, and the inhibitory DNA (b) originally bound  
 258 with the aptamer portion is subsequently released.

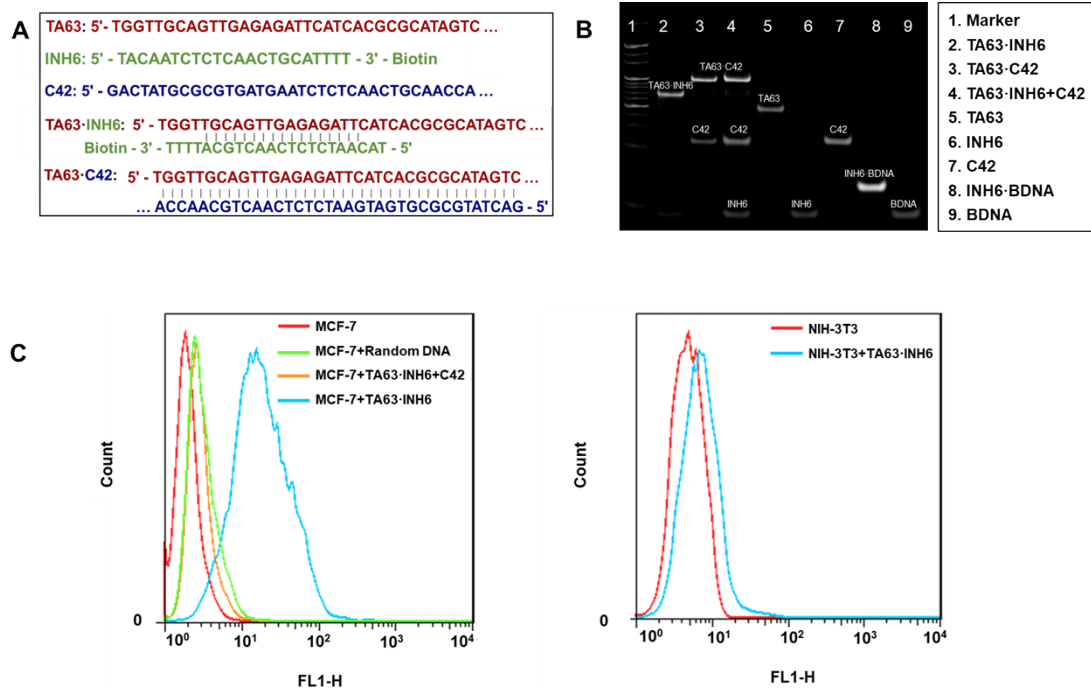

259

260 **Figure S2.** Characteristic evaluation of the activable aptamer. (A) Sequences of TA63,  
 261 the INH6 and C42 in the activable aptamer. Sequences of TA63·INH6 and TA63·C42  
 262 hybrids are also shown. (B) PAGE image of TA63, INH6 and C42 in the activable  
 263 aptamer, the BDNA in the mass-tagged MOF nanoprobe, and their corresponding  
 264 hybrids. (C) Flow cytometric analysis of MCF-7 cells and NIH-3T3 cells treated with  
 265 FITC-labeled activable aptamer and the FITC-labeled random DNA.

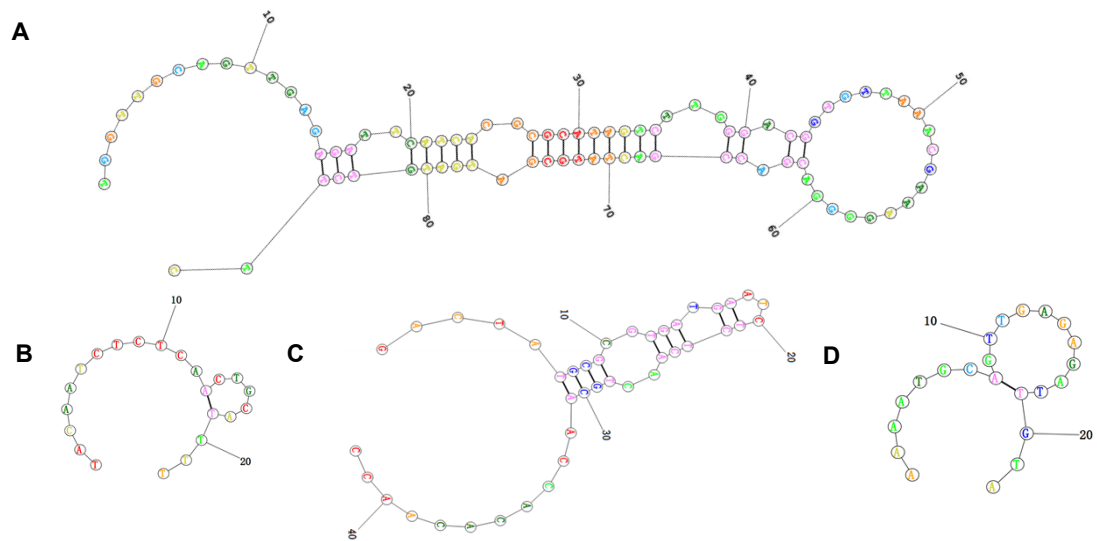

266

267 **Figure S3.** The secondary structures of (A) TA63, (B) INH6, (C) C42 and (D) BDNA  
 268 were predicted using the RNAstructure software  
 269 ([http://rna.urmc.rochester.edu/RNA structureWeb/](http://rna.urmc.rochester.edu/RNA%20structureWeb/)).

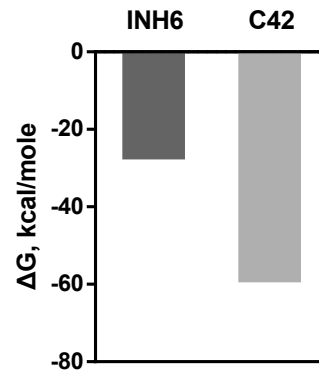

270

271 **Figure S4.** The  $\Delta G$  values of the hybridization of INH6 and C42 with TA63 were  
272 predicted through an Oligo Analyzer analysis software  
273 (<https://sg.idtdna.com/pages/tools/oligoanalyzer?returnurl=%2Fcalc%2Falyzer>).

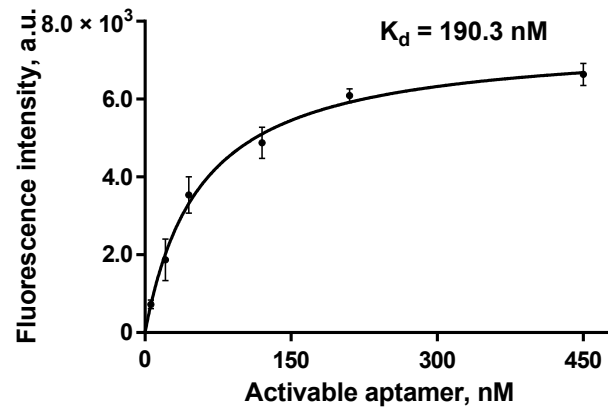

274

275 **Figure S5.** The representative binding curve of the activable aptamer with  
276 recombinant CD44 protein. Error bars represent the standard deviations of three  
277 replicate measurements.

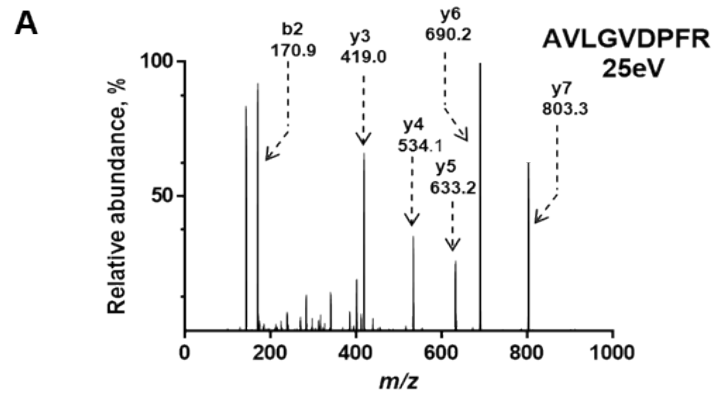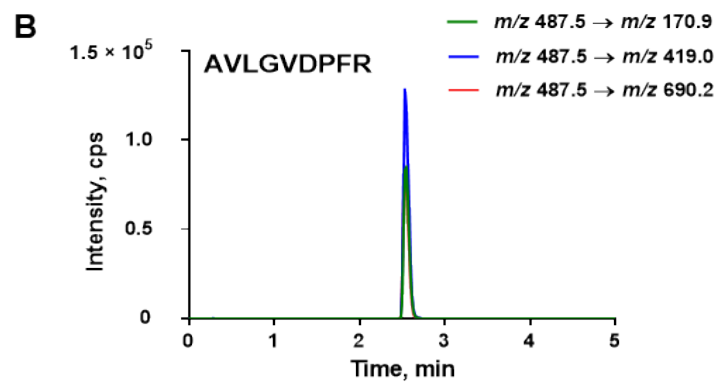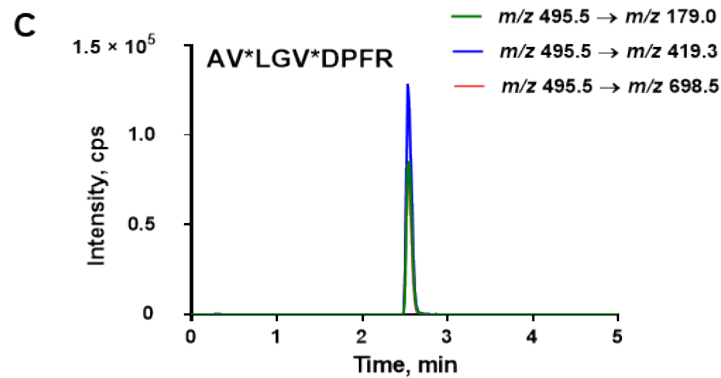

278

279 **Figure S6.** Establishment of mass spectrometry quantification method for the mass  
 280 tag. (A) The product ion spectrum of AVLGVDPFR, and (B-C) the LC-MS/MS  
 281 chromatograms of AVLGVDPFR and its corresponding isotope-labeled internal  
 282 standard AV\*LGV\*DPFR.



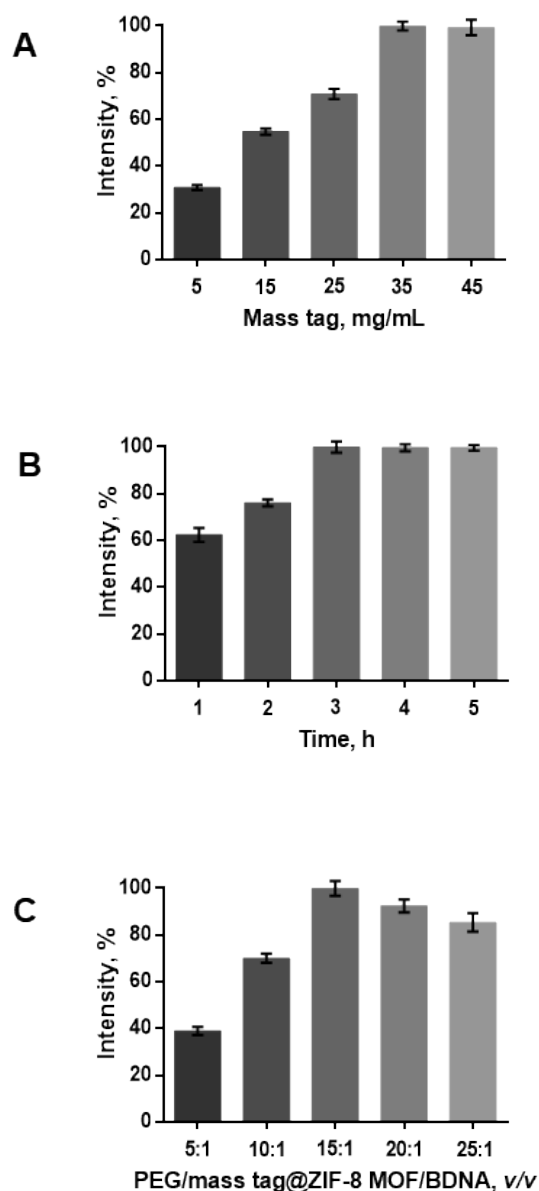

283

284 **Figure S7.** Optimization of the mass-tagged MOF nanoprobe preparation conditions,  
 285 including (A) incubation concentration of the mass tag and (B) incubation time for  
 286 the self-assembly reaction, and (C) reaction ratio of PEG/mass tag@ZIF-8 MOF and  
 287 BDNA *via* copper-free click reaction. The incubation concentration of the mass tag  
 288 ranged from 5 mg/mL to 45 mg/mL while keeping the reaction time of 2 h. Reaction  
 289 time varied in the range of 1 h to 5 h with the incubation concentration of the mass  
 290 tag as 35 mg/mL. Reaction ratio of PEG/mass tag@ZIF-8 MOF and BDNA (1  $\mu$ M)  
 291 ranged from 5:1 to 25:1. Error bars represent the standard deviations of three  
 292 replicate measurements.

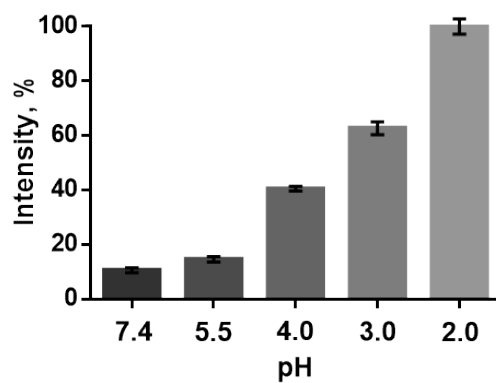

293

294 **Figure S8.** pH effect on acidolysis of the mass-tagged MOF nanoprobe. pH of  
295 acidolysis varied between 2.0 and 7.4. Error bars represent the standard deviations  
296 of three replicate measurements.

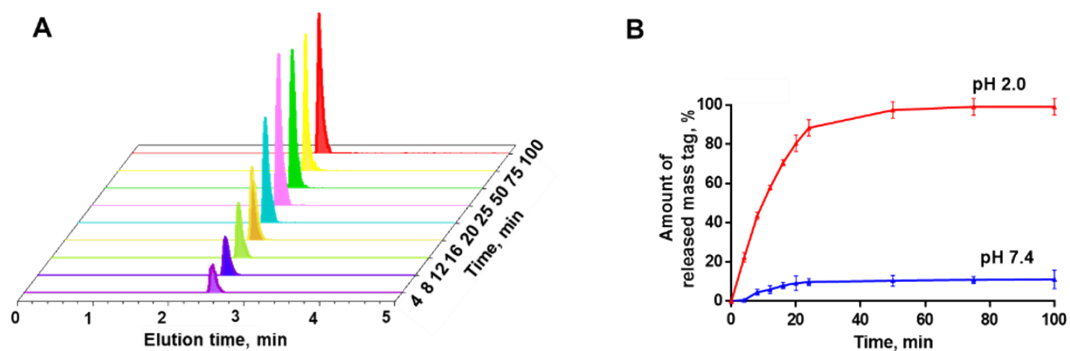

297

298 **Figure S9.** Characteristic evaluation of the mass tag. (A) Signal of the mass tag  
 299 released from BDNA/PEG/mass tag@ZIF-8 MOF after different acidolysis times at pH  
 300 2.0. (B) Cumulative curves of the mass tag released from the BDNA/PEG/mass  
 301 tag@ZIF-8 MOF at pH 7.4 and pH 2.0. Error bars represent the standard deviations of  
 302 three replicate measurements.

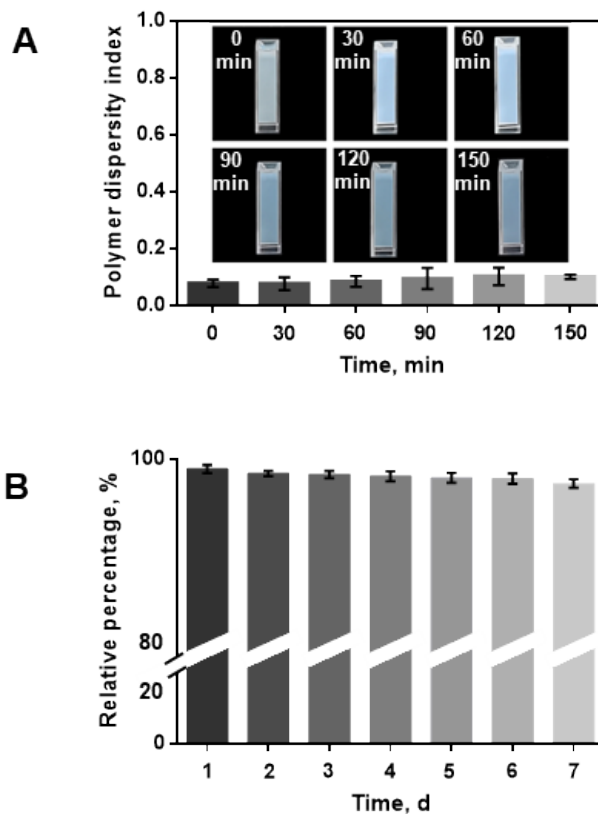

303

304 **Figure S10.** Dispersibility and stability of the mass-tagged MOF nanoprobe. (A) PDI of  
 305 the nanoprobe at room temperature after the time period ranging from 0 to 150  
 306 min. (B) The mass spectrometric signals detected using the nanoprobe through a  
 307 week. Error bars represent the standard deviations of three replicate measurements.

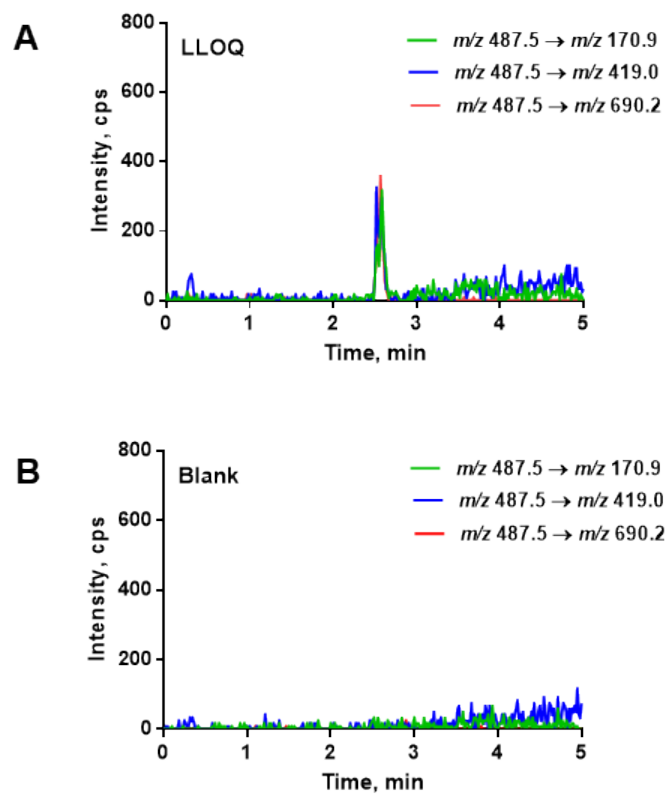

308

309 **Figure S11.** LC-MS/MS chromatograms of (A) LLOQ and (B) matrix blank.

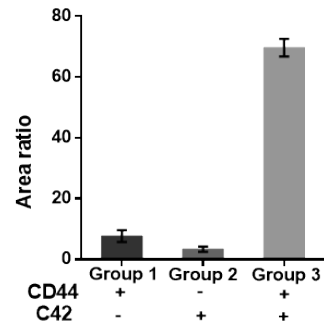

310

311 **Figure S12.** Selectivity of the mass-tagged MOF nanoprobe approach. No significant  
312 signal was detected in the absence of CD44 or C42.

313

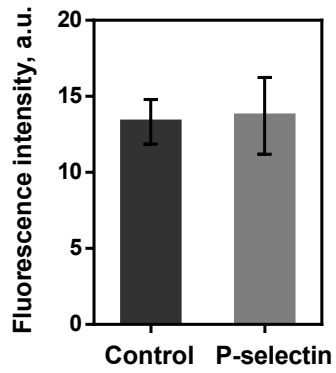

314

315 **Figure S13.** Measurement of P-selectin expression as the platelet activation marker  
316 in normal individuals and controls. Controls are the platelets that were not  
317 incubated with PE-modified P-selectin. Error bars represent the standard deviations  
318 of three replicate measurements.

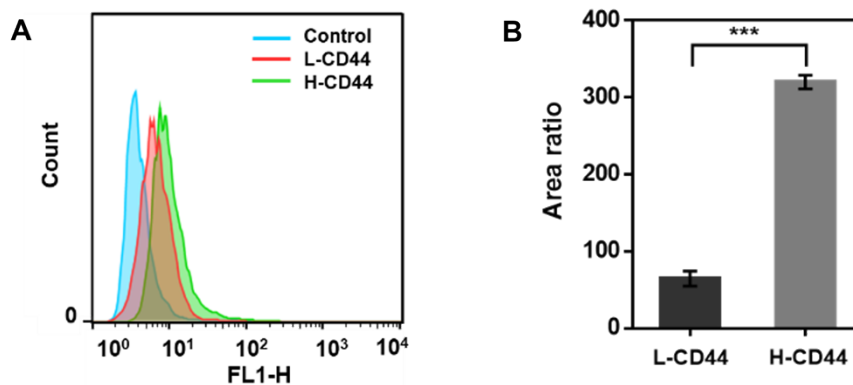

319

320 **Figure S14.** Detection of CD44 in the platelet samples from breast cancer patients  
 321 with the lowest and highest CD44 expression by (A) flow cytometry and (B) mass-  
 322 tagged MOF nanoprobe approach. Controls are the platelets that were not incubated  
 323 with FITC-labeled CD44. L-CD44: platelets with lower expression of CD44, H-CD44:  
 324 platelets with higher expression of CD44.



325 **3. Supplementary Tables**

326 **Table S1.** List of the DNA sequences used in this study. <sup>a</sup>

|                                                | Name | Sequences (5' to 3')                                                                                          |
|------------------------------------------------|------|---------------------------------------------------------------------------------------------------------------|
|                                                | TA6  | GAGATTCATCACGCGCATAGTCTTGGGACGGTGTTAAACGA<br>AAGGGGACGACCGACTATGCGATGATGTCTTC                                 |
| Aptamer portion<br>of the activable<br>aptamer | TA61 | <b>GGTTGTGTGGTTGCAGTTG</b> AGAGATTCATCACGCGCATAGT<br>CTTGGGACGGTGTTAAACGAAAGGGGACGACCGACTATGCG<br>ATGATGTCTTC |
|                                                | TA62 | <b>GTGTGGTTGCAGTTG</b> AGAGATTCATCACGCGCATAGTCTTG<br>GGACGGTGTTAAACGAAAGGGGACGACCGACTATGCGATG<br>ATGTCTTC     |
|                                                | TA63 | <b>TGGTTGCAGTTG</b> AGAGATTCATCACGCGCATAGTCTTGGGA<br>CGGTGTTAAACGAAAGGGGACGACCGACTATGCGATGATGT<br>CTTC        |
| Inhibitory DNA<br>of the activable<br>aptamer  | INH1 | TACAATCTCTCAATTTT                                                                                             |
|                                                | INH2 | TACAATCTCTCAACATTT                                                                                            |
|                                                | INH3 | TACAATCTCTCAACTTTTT                                                                                           |
|                                                | INH4 | TACAATCTCTCAACTGTTTT                                                                                          |
|                                                | INH5 | TACAATCTCTCAACTGCTTTT                                                                                         |
|                                                | INH6 | TACAATCTCTCAACTGCATTTT                                                                                        |
|                                                | INH7 | TACAATCTCTCAACTGCAATTTT                                                                                       |
|                                                | INH8 | TACAATCTCTCAACTGCAACTTTT                                                                                      |
| Competing DNA                                  | C42  | GACTATGCGCGTGATGAATCTCTCAACTGCAACCACACAACC                                                                    |
| Binding DNA                                    | BDNA | AAAATGCAGTTGAGAGATTGTA                                                                                        |

327 <sup>a</sup> The sequences in bold represent the bases added at 5' end of CD44 aptamer as the extended  
328 sequence.

329

330 **Table S2.** Comparison of our approach with the previously reported signal  
331 amplification methods for CD44 quantification.

| CD44 quantification methods   | Linear range (ng/mL)               | LOD (pg/mL) |
|-------------------------------|------------------------------------|-------------|
| Fluorescence <sup>2</sup>     | 0 – 10 <sup>2</sup>                | 23          |
| Electrochemistry <sup>3</sup> | 10 <sup>-2</sup> – 10 <sup>2</sup> | 10          |
| Mass-tagged MOF nanoprobe     | 10 <sup>-2</sup> – 10 <sup>2</sup> | 5           |

332

333

334

335 **Table S3.** Evaluation of the accuracy and precision of the mass-tagged MOF  
 336 nanoprobe approach.

| <b>Concentration of CD44</b>    | <b>10.0 pg/mL</b> | <b>30.0 pg/mL</b> | <b>1.00 ng/mL</b> | <b>80.0 ng/mL</b> |
|---------------------------------|-------------------|-------------------|-------------------|-------------------|
| <b>Mean</b>                     | 9.28              | 27.9              | 1.05              | 80.5              |
| <b>%Bias</b>                    | -7.2              | -7.0              | 5.0               | 0.6               |
| <b>Intraday Precision (%CV)</b> | 0.9               | 9.9               | 9.3               | 5.8               |
| <b>Interday Precision (%CV)</b> | 6.6               | 14.5              | 10.0              | 11.6              |
| <b>n</b>                        | 18                | 18                | 18                | 18                |
| <b>Number of Runs</b>           | 3                 | 3                 | 3                 | 3                 |

337

338 **Table S4.** Clinical information of normal individuals and breast cancer patients.

| <b>Groups</b>                 | <b>Number</b> | <b>Female</b> | <b>Male</b> | <b>Age (SD)</b> |
|-------------------------------|---------------|---------------|-------------|-----------------|
| <b>Breast cancer patients</b> | 54            | 54            | 0           | 50.3 (12.5)     |
| <b>Normal individuals</b>     | 10            | 6             | 4           | 76.2 (12.2)     |

339

## 340 **4. Supplementary Results**

### 341 **4.1. LC-MS/MS method of the mass tag**

342 The AVLGVDPFR double-charged precursor ion 487.5 with three highly  
343 responsive product ions b2  $m/z$  170.9, y3  $m/z$  419.0 and y6  $m/z$  690.2 was selected  
344 for multiple reaction monitoring (MRM) transitions. The corresponding stable  
345 isotope-labeled peptide AV\*LGV\*DPFR with [D8] Val at positions 2 and 5 was  
346 synthesized as an internal standard. Thus, the peak areas of the MRM transitions  
347 ( $m/z$  487.5  $\rightarrow$   $m/z$  170.9,  $m/z$  487.5  $\rightarrow$   $m/z$  419.0, and  $m/z$  487.5  $\rightarrow$   $m/z$  690.2) and  
348 the corresponding internal standard transitions were summed for the following  
349 quantitative analysis.

350

### 351 **4.2. Characterization results of the mass-tagged MOF nanoprobe**

352 First, TEM and SEM results revealed that the edges of PEG/mass tag@ZIF-8  
353 MOF and BDNA/PEG/mass tag@ZIF-8 MOF were slightly blurred, whereas both ZIF-8  
354 and mass tag@ZIF-8 MOF exhibited a regular rhombic dodecahedron shape.<sup>4</sup> This  
355 surface irregularity may be caused by the coating with PEG and BDNA.<sup>5,6</sup> In addition,  
356 DLS results demonstrated that the average diameter of ZIF-8 MOF gradually  
357 increased from ~180 nm to ~210 nm with the sequential addition of the mass tag,  
358 PEG and BDNA. This result is consistent with the outcomes of TEM and SEM. Notably,  
359 by referring to the previous studies for optimization of MOF particle size,<sup>7-10</sup> we  
360 tuned molar ratio of  $Zn(NO_3)_2 \cdot 6H_2O$  to 2-methylimidazole (1:8 to 1:640), reaction  
361 temperature (25 °C to 50 °C), reaction solvent ( $H_2O$ , MeOH and DMF) and reaction  
362 time (10 min to 8 h), and obtained the ZIF-8 MOF particles in the size range of 100 -  
363 1000 nm. The results indicated that the ZIF-8 MOF with the particle size of 200 nm  
364 has a better stability and a higher carrying capacity of mass tags. The PXRD data  
365 confirmed that the modified ZIF-8 MOF retained the same crystalline form as the  
366 original material, suggesting that our modifications did not change the three-  
367 dimensionally ordered structure of ZIF-8 MOF.

368 Furthermore, the signal at  $1677\text{ cm}^{-1}$  in the FT-IR spectrum of the mass  
369 tag@ZIF-8 MOF corresponded to the C=O stretching mode of the mass tag. In the FT-

370 IR spectrum of PEG/mass tag@ZIF-8 MOF, a characteristic peak at 1114 cm<sup>-1</sup>  
371 corresponding to C–O–C appeared, indicating the presence of PEG. The peak  
372 approximately 1247 cm<sup>-1</sup> in the spectrum of BDNA/PEG/mass tag@ZIF-8 MOF,  
373 demonstrated the successful modification of BDNA. The signal intensity reduction at  
374 1677 cm<sup>-1</sup> in the spectra of PEG/mass tag@ZIF-8 MOF and BDNA/PEG/mass tag@ZIF-  
375 8 MOF may be caused by the PEG coating, which also implied that the mass tag was  
376 encapsulated in ZIF-8 MOF rather than adsorbed on its surface.

377 Moreover, the zeta potential of BDNA/PEG/mass tag@ZIF-8 MOF was in a  
378 negative state, in contrast to that of PEG/mass tag@ZIF-8 MOF, further confirming  
379 the successful modification with BDNA. The energy dispersive EDX elemental  
380 mapping image showed the appearance of Zn, N, O, and P elements in the  
381 BDNA/PEG/mass tag@ZIF-8 MOF. In the TGA, a weight loss of 0.9% between 80 °C  
382 and 350 °C can be attributed to the mass tag. The weight loss of 4.2% between 350  
383 °C and 430 °C can be ascribed to the decomposition of PEG molecules.

384 The dispersibility and stability of the BDNA/PEG/mass tag@ZIF-8 MOF  
385 nanoprobe were also investigated. Using visual observation and polymer dispersity  
386 index measurement (PDI), we found that the MOF nanoprobe maintained a good  
387 dispersion within 150 min at room temperature. Although part of the MOF  
388 nanoprobe settled due to gravity over time, it can be easily resuspended by gentle  
389 shaking. In addition, the stability of the MOF nanoprobe was assessed. As a result,  
390 the detected mass spectrometric signal was reduced to (91.5 ± 1.5)% after 1 week of  
391 nanoprobe storage.

392 Finally, to reduce steric hindrance effect, the amount of streptavidin-modified  
393 agarose beads used in this study was relatively higher than the amount routinely  
394 recommended for binding assays. The average number of MOF nanoprobe per  
395 streptavidin agarose bead was estimated to be no more than 20 for sample analysis.  
396

### 397 **4.3. Validation results of the mass-tagged MOF nanoprobe approach**

398 The quality control (QC) results indicated acceptable accuracy and intra- and  
399 interday precision of the assay. In addition, the selectivity of the approach was

400 further evaluated. Remarkably, no significant signal was detected in the absence of  
401 C42 or CD44, and also in CD44-negative NIH-3T3 cells and CD44-blocked MDA-MB-  
402 231 cells, demonstrating good selectivity of the approach. Finally, the reproducibility  
403 of the approach was examined using five different lots of the nanoprobe. The results  
404 showed similar signal intensities with a relative standard deviation (RSD) of 2.1%. We  
405 also compared the assay with the other signal amplification methods previously  
406 reported, and a higher sensitivity was observed.  
407

## 408 **References**

- 409 1 A. Somasunderam, V. Thiviyathan, T. Tanaka, X. Li, M. Neerathilingam and G. L. Lokesh,  
410 *Biochemistry*, 2010, **49**, 9106.
- 411 2 Y. Huang, X. Yao, R. Zhang, L. Ouyang, R. Jiang and X. Liu, *ACS Appl. Mater. Interfaces*, 2014, **6**,  
412 19144.
- 413 3 R. Zhang, C. Rejeeth, W. Xu, C. Zhu, X. Liu, J. Wan, M. Jiang and K. Qian, *Anal. Chem.*, 2019, **91**,  
414 7078.
- 415 4 J. Feng, X. Liang and Z. Ma, *Biosens. Bioelectron.*, 2021, **175**, 112853.
- 416 5 A. Maleki, M. A. Shahbazi, V. Alinezhad and H. A. Santos, *Adv. Healthc Mater.*, 2020, **9**, e2000248.
- 417 6 J. Zhang, M. He, C. Nie, M. He, Q. Pan and C. Liu, *Chem. Sci.*, 2020, **11**, 7092.
- 418 7 S. Watanabe, S. Ohsaki, T. Hanafusa, K. Takada, H. Tanaka, K. Mae and M. T. Miyahara, *Chemical*  
419 *Engineering Journal*, 2017, **313**, 724.
- 420 8 G. Lu, S. Li, Z. Guo, O. K. Farha, B. G. Hauser, X. Qi, Y. Wang, X. Wang, S. Han, X. Liu, J. S. DuChene,  
421 H. Zhang, Q. Zhang, X. Chen, J. Ma, S. C. Loo, W. D. Wei, Y. Yang, J. T. Hupp and F. Huo, *Nat. Chem.*,  
422 2012, **4**, 310.
- 423 9 Y. V. Kaneti, S. Dutta, M. S. A. Hossain, M. J. A. Shiddiky, K. L. Tung, F. K. Shieh, C. K. Tsung, K. C.  
424 Wu and Y. Yamauchi, *Adv. Mater.*, 2017, **29**, 1700213.
- 425 10 R. Wu, T. Fan, J. Chen and Y. Li, *ACS Sustainable Chemistry & Engineering*, 2019, **7**, 3632.
